# Supplementary material for: Comparative Analysis of DNA Word Abundances in Four Yeast Genomes Using a Novel Statistical Background Model
Source: PLoS One. 2013 Mar 5;8(3):e58038. doi: 10.1371/journal.pone.0058038 (PMC3589456; doi:10.1371/journal.pone.0058038)
Supplement: Table S2 — Comparison of the top 20 8-mers calculated using six different methods as to their matches with transcription factor (TF) binding motifs in Yeastract. 8-mers derived from the region 500 bases upstream of all yeast ORFs were ranked by their relative abundance as calculated by several background models. The top 20 8-mers ranked by decreasing fold enrichment scores from (a) our novel background model, the “Ak-1 method” were compared to those from the previously described C0/C1 method (b), from Markov models of order 4 sorted by Z-scores (c), from Markov models of order 4 sorted by Binomial probabilities (d), from Markov models of order 3 ranked by Z-scores (e) and, Markov models of order 3 ranked by binomial probabilities (f). The list of 20 8-mers derived by applying our method was chosen as the reference against which the other lists were compared. 8-mers in each list that are identical to the ones in the reference list are marked with a superscript number which shows its rank in the reference column (a), while repeat-rich elements are shown in red. The nine 8-mers identified uniquely by our method are highlighted in bold (a). The actual TF-binding motif matching the 8-mer along with the name of the TF from Yeastract are shown right next to each column of 8-mers. Both ‘Yeastract binding site inside of the inserted motif’ as well as ‘Inserted motif inside Yeastract binding site’ hits were considered. (XLSX) [file pone.0058038.s023.xlsx]

## Sheet: Sheet1
Rank	Ak-1 (a)	Matches to Yeastract motifs	C0/C1 (b)	Matches to Yeastract motifs	MM4 Z-score (c )	Matches to Yeastract motifs	MM4 Binomial (d)	Matches to Yeastract motifs	MM3 Z-score (e)	Matches to Yeastract motifs	MM3 Binomial (f)	Matches to Yeastract motifs
1	CCTCGAGG	CTCGA & TCGAG- Xbp1 binding site	CCTCGAGG1	CTCGA & TCGAG- Xbp1 binding site	GCGATGAG2	N	TAATATTA	N	TATATATA	N	TATATATA	N
2	GCGATGAG	N	GCGATGAG2	N	TAATATTA	N	GCGATGAG2	N	GCGATGAG2	N	ATATATAT	N
3	CCCAGCGC	CCAGC - Hac1p binding site	TAGCCGCC14	part of TAGCCGCCA- Ume6p binding site	CCTCGAGG1	CTCGA & TCGAG- Xbp1 binding site	AAAAGAAA	N	ATATATAT	N	GCGATGAG2	N
4	CCGAGTGG	N	CTCGAGGA8	CTCGA & TCGAG- Xbp1 binding site	CGGTGTTA	CGGNS-Stb5p binding site	CGGTGTTA	CGGNS-Stb5p binding site	CCTCGAGG1	CTCGA & TCGAG- Xbp1 binding site	TTTTTTTC	N
5	GGAAGCTG	GGAAG - Gcr1p binding site	CGGTGTTA	CGGNS-Stb5p binding site	GTTACCCG	N	CCTCGAGG1	CTCGA & TCGAG- Xbp1 binding site	GTTACCCG	N	GAAAAAAA	N
6	TCCTCGAG	CTCGA & TCGAG- Xbp1 binding site	TCCTCGAG6	CTCGA & TCGAG- Xbp1 binding site	GGAAGCTG5	GGAAG - Gcr1p binding site	GGAAGCTG5	GGAAG - Gcr1p binding site	CTCGAGGA8	N	AAAAGAAA	N
7	CGCGTCGC	N	TACGGTGT	CGGNS-Stb5p binding site	CTCGAGGA8	CTCGA & TCGAG- Xbp1 binding site	GTTACCCG	N	CCGGGTAA	CCGGGTAA- Reb1p binding site	CCTCGAGG1	CTCGA & TCGAG- Xbp1 binding site
8	CTCGAGGA	CTCGA & TCGAG- Xbp1 binding site	GGCGGCTA	N	CGGGTAAC	N	CTCGAGGA8	CTCGA & TCGAG- Xbp1 binding site	CTCATCGC	N	CTCGAGGA8	N
9	GATGAGCT	N	CCGGGTAA	CCGGGTAA- Reb1p binding site	CCGGGTAA	CCGGGTAA- Reb1p binding site	CTAGTATA	N	CGGGTAAC	N	GTTACCCG	N
10	GATGACGC	N	GGAAGCTG5	GGAAG - Gcr1p binding site	CTAGTATA	N	TTTCTTTT	N	TCCTCGAG6	CTCGA & TCGAG- Xbp1 binding site	CTCATCGC	N
11	ATACGGTG	CGGNS-Stb5p binding site	GTTACCCG	N	ACTTCTAG	N	ACTTCTAG	N	TTACCCGG	TTACCCGG- Reb1p binding site	TTTCTTTT	N
12	GCGCGCGC	N	ATACGGTG11	CGGNS-Stb5p binding site	CTCATCGC	N	CTCATCGC	N	CGATGAGC	N	CATATATA	N
13	GCGCCCGC	SNCCG - Stb5p binding site	TTACCCGG	TTACCCGG- Reb1p binding site	TCCTCGAG6	CTCGA & TCGAG- Xbp1 binding site	CCGGGTAA	CCGGGTAA- Reb1p binding site	TTTTTTTC	N	CCGGGTAA	CCGGGTAA- Reb1p binding site
14	TAGCCGCC	part of TAGCCGCCA- Ume6p binding site	TTTTTTTC	N	GATTCCTA	TTCCKA- Mot3p binding site	CGGGTAAC	N	GAAAAAAA	N	ATATGTAT	N
15	GCGACGCG	N	TCCGGGTA	N	AAAAGAAA	N	TGATAATG	N	GATGAGCT9	CCGGGTAA- Reb1p binding site	ATACATAT	N
16	CACGTGAC	CACGTGAY- Cbf1p binding site,CACGTGA - Met4p binding site,CACGTG - Gcn4p binding site,MACGTG - Pho4p binding site,GTGAC- Rtg1p, Rtg3p binding site	CGGGTAAC	N	GAAGCTGA	N	GAAGCTGA	N	GGAAGCTG5	GGAAG - Gcr1p binding site	TCCTCGAG6	CTCGA & TCGAG- Xbp1 binding site
17	GGATTCCT	N	CGATGAGC	N	GGATTCCT17	N	TCCTCGAG6	CTCGA & TCGAG- Xbp1 binding site	ATATGTAT	N	TATACATA	N
18	GCCCCCGG	SNCCG - Stb5p binding site	GAAAAAAA	N	TACGGTGT	CGGNS-Stb5p binding site	AGGAGAAC	N	ATTACCCG	N	CGGGTAAC	N
19	GGCGCGTC	N	CTCATCGC	N	TTACCCGG	TTACCCGG- Reb1p binding site	GATTCCTA	TTCCKA- Mot3p binding site	CGGTGTTA	CGGNS-Stb5p binding site	TTACCCGG	TTACCCGG- Reb1p binding site
20	ACGCAAGG	N	ATTACCCG	N	AGGAGAAC	N	GGATTCCT17	N	AAAAGAAA	N	TATGTATA	N
	No: TF binding site matches	17		13		12		10		9		6
