# Supplementary material for: Comparative Analysis of DNA Word Abundances in Four Yeast Genomes Using a Novel Statistical Background Model
Source: PLoS One. 2013 Mar 5;8(3):e58038. doi: 10.1371/journal.pone.0058038 (PMC3589456; doi:10.1371/journal.pone.0058038)
Supplement: Table S3 — Comparison of the top 20 9-mers calculated using two different methods as to their matches with transcription factor (TF) binding motifs in Yeastract. 9-mers derived from the region 500 bases upstream of all yeast ORFs were ranked by their relative abundance as calculated by different background models. The top 20 9-mers ranked by decreasing fold enrichment scores from (a) our novel background model, the “Ak-1 method” were compared to those from the previously described C0/C1 method (b). The list of 20 9-mers derived by applying our method was chosen as the reference against which the other list was compared. 9-mers in each list that are identical to the ones in the reference list are marked with a superscript number which shows its rank in the reference column (a), while repeat-rich elements are shown in red. The 9-mers identified uniquely by our method are highlighted in bold (a). The actual TF-binding motif matching the 9-mer and the name of the TF from Yeastract are shown next to each column of 9-mers. Both ‘Yeastract binding site inside of the inserted motif’ as well as ‘Inserted motif inside Yeastract binding site’ hits were considered. (XLSX) [file pone.0058038.s024.xlsx]

## Sheet: Sheet1
Rank	Ak-1 (a)	Matches to Yeastract motifs	C0/C1 (b)	Matches to Yeastract motifs
1	GGATTCCTA	N	GAGGATTCC20	N
2	CCTCGAGGA	CTCGA- Xbp1p binding site	GGGACTCCG	CGGNS- Stb5p binding site
3	ATACGGTGT	CGGNS- Stb5p binding site	GCTGAAACG16	N
4	TCCTCGAGG	CTCGA- Xbp1p binding site	GGAGACCGG	N
5	ACGGTGTTA	CGGNS- Stb5p binding site	GAGAACTTC7	N
6	TATACGGTG	CGGNS- Stb5p binding site	CCCGCGGGG	CGGNS- Stb5p binding site
7	GAGAACTTC	N	GCACGCGAC	N
8	CTGAAACGC	N	GCGCGCCTC	N
9	GGAAGCTGA	CTTCC (R)- Gcr1p binding site	CCACGCGGC	N
10	ATCCTCGAG	CTCGA- Xbp1p binding site	GGAATGAGG	CTTCC (R)- Tec1p binding site
11	CATATACGG	N	CAAGGATTG13	AAGGWT- Mot3p binding site
12	TACGGTGTT	CGGNS- Stb5p binding site	CCGCCGAGG	CGGNS (R)- Stb5p binding site
13	CAAGGATTG	AAGGWT- Mot3p binding site	GACTCCCCG	CGGNS (R)- Stb5p binding site
14	CTCGAGGAG	CTCGA- Xbp1p binding site	CGGAATGAG	CATTCC (R)- Tec1p binding site
15	GAGGAGAAC	N	CTGAAACGC8	N
16	GCTGAAACG	N	CTCGAGGAG14	CTCGA- Xbp1p binding site
17	CGCAAGGAT	AAGGWT- Mot3p binding site	GGATCAATG18	YTGAT (R)- Ash1p binding site
18	GGATCAATG	YTGAT (R)- Ash1p binding site	GGCTAAGCG	N
19	GCAAGGATT	AAGGWT- Mot3p binding site	GAGGAGAAC15	N
20	GAGGATTCC	N	CCTAAATCC	N
	No: TF binding site matches	13		9
